# Supplementary material for: Multivariate mining of an alpaca immune repertoire identifies potent cross-neutralizing SARS-CoV-2 nanobodies
Source: PubMed Central journal article supplement — Sci Adv. 2022 Mar 25;8(12):eabm0220. doi: 10.1126/sciadv.abm0220 (PMC8956255; doi:10.1126/sciadv.abm0220), 2022-03-25
Supplement: sciadv.abm0220_sm.pdf [file sciadv.abm0220_sm.pdf]

Supplementary Materials for

**Multivariate mining of an alpaca immune repertoire identifies potent cross-neutralizing SARS-CoV-2 nanobodies**

Leo Hanke, Daniel J. Sheward, Alec Pankow, Laura Perez Vidakovics, Vivien Karl, Changil Kim, Egon Urgard, Natalie L. Smith, Juan Astorga-Wells, Simon Ekström, Jonathan M. Coquet, Gerald M. McInerney\*, Ben Murrell\*

\*Corresponding author. Email: gerald.mcinerney@ki.se (G.M.M.); benjamin.murrell@ki.se (B.M.)

Published 25 March 2022, *Sci. Adv.* **8**, eabm0220 (2022)  
DOI: 10.1126/sciadv.abm0220

**The PDF file includes:**

Tables S1 and S2  
Figs. S1 and S2  
Legend for data file S1

**Other Supplementary Material for this manuscript includes the following:**

Data file S1

**Table S1: Nanobody amino acid sequences**

| Name       | AA sequence                                                                                                                             |
|------------|-----------------------------------------------------------------------------------------------------------------------------------------|
| <b>C11</b> | QVQLVESGGGLVQPGGSLRLSCAASGSIVSNAMGWYRQAPGKERELVAAITRGGITNYADSVKGRFTISRDNATNAVYLMNLTLPED<br>TAVYYCNAWVPVEEVAGIARQFQEVWGQGTQVTVSS         |
| <b>C7</b>  | QVQLVESGGGLVQPGGSLKLSCAASGEFFRLLIMGWYRQAPGKQRELVASITPGGSTNYADSVKGRFTISRDNAKMVMYLMNLTLPED<br>TALYYCNAAVDGGGGYVPGRGDYWGQGTQVTVSS          |
| <b>D4</b>  | QVQLVESGGGLVQPGGSLRLSCAASGSVFIINAMGWYRQAPGKQRELVAAITSSGSTNYADSVKGRFTISRDNAKDTVYLMNLTLPED<br>TAVYYCNAKGSWYDLGGGAGDDYWGQGTQVTVSS          |
| <b>D9</b>  | QVQLVESGGGLVQPGGSLRLSCAASGSIFS IHMGWYRQAPGKERELVATITSRGTTNYADSVKGRFTISRDNAKNTVYLMNLTLPED<br>TAVYYCNAEFGTTPVGYDYWGQGTQVTVSS              |
| <b>E11</b> | QVQLVESGGGLVQAGGSLRLSCAASGRTFSSNFVWGFRQAPGKEREFVAAISWNGVNTYYADSVKGRFTISRDNAKNTLYLMNLTLPED<br>DTAVYYCASGGEPLPRYYTDYASWVDYWGKGTQVTVSS     |
| <b>E2</b>  | QVQLVESGGGLVQPGGSLRLSCVASITMNSIVARAWYRQAPGKEREFIASITDDITNYADSVKGRFTISRDHGKNTVYLMNLTLPED<br>TAVYYCHLRTFRAGADTIPIYWGQGTQVTVSS             |
| <b>E4</b>  | QVQLVESGGGLVQPGGSLRLSCAASGFTLDDYAIGWFRQAPGKEREGVSFITSSDGSYYVDSVKGRFTISRDNAKNTVYLMNLTLPED<br>DTAIYYCAVGPSPFSYTGSTYYRSELPWDYDYWGQGTQVTVSS |
| <b>F1</b>  | QVQLVESGGGLVQAGGSLRLSCAASGRTFSSYVMAWFRQAPGKEREFVATMDSSGGNRYGDSVKDRFTISRDNAKNTVYLMNLTLPED<br>DTAVYYCAAYTGRMATGWNGGWKEYDYWGQGTQVTVSS      |
| <b>F12</b> | QVQLVESGGGLVQAGGSLRLSCAASGRTFSSNAMGWFRQAPGKERDFVAAISWGGSTYYADSVKGRFTISRDNAKNTVYLMNLTLPED<br>DTAVYYCAAGGEPLPRYWTDYASWVDYWGKGTQVTVSS      |
| <b>G1</b>  | QVQLVESGGGLVQGGSLRLSCAASGRTFSSNAMGWFRQAPGKEREFVAAINWSSGGSTYYADSVKGRFTISRDNKNTVYLMNLTLPED<br>DTAVYFCAAGGEPLPRYWSYASWVDYWGKGTQVTVSS       |
| <b>G2</b>  | QVQLVESGGGLVQAGGSLRLSCAASGRTFSSNYAMGWFRQAPGKEREFVAAISWSSGGSTYYADSVKGRFTISRDNKNTVYLMNLTLPED<br>DAAVYYCAAGGEGYDSYDGPPLAPDYWGQGTQVTVSS     |
| <b>G6</b>  | QVQLVESGGGLVQPGGSLRLSCAASGFTLDDYAIGWFRQAPGKEREGVSCIIISNDGIKYYSDSVKGRFTISRDNKNTVYLMNLTLPED<br>DTAVYYCAAERWGYSDCVAGYGM DYWGKGTQVTVSS      |

**Table S2: Nanobody CDR sequences (Chothia)**

| <b>Name</b> | <b>CDR1</b> | <b>CDR2</b> | <b>CDR3</b>            |
|-------------|-------------|-------------|------------------------|
| <b>C11</b>  | GSIVSNN     | TRGGI       | WVPVEEVAGIARQFQEV      |
| <b>C7</b>   | GEFFRLL     | TPGGS       | AAVDGGGGYVPGRGDY       |
| <b>D4</b>   | GSVFIIN     | TSSGS       | KGSSWYDLGGGAGDDY       |
| <b>D9</b>   | GSIFSIH     | TSRGT       | EFGTPPVGYDY            |
| <b>E11</b>  | GRTFSNS     | SWNGVN      | GGEPLPRYYTDYASWVDY     |
| <b>E2</b>   | ITMNSIV     | TTDDI       | RTFRRAGADTIPY          |
| <b>E4</b>   | GFTLDDY     | TSSDGS      | GPSFSYTGSTYYRSELPWDYDY |
| <b>F1</b>   | GRTFSSY     | DSSGGN      | YTGRMATGWGNGGWKEYDY    |
| <b>F12</b>  | GRTFSNN     | SWSGDS      | GGEPLPRYWTDYASWVDY     |
| <b>G1</b>   | GRTFSSN     | NWSGGS      | GGEPLPRYWSDYASWVDY     |
| <b>G2</b>   | GRTFSNY     | SWSGGS      | GGEGYDSDYGPPLAPDY      |
| <b>G6</b>   | GFTLDDY     | ISNDGI      | ERWGYSDCVAGYGMDY       |

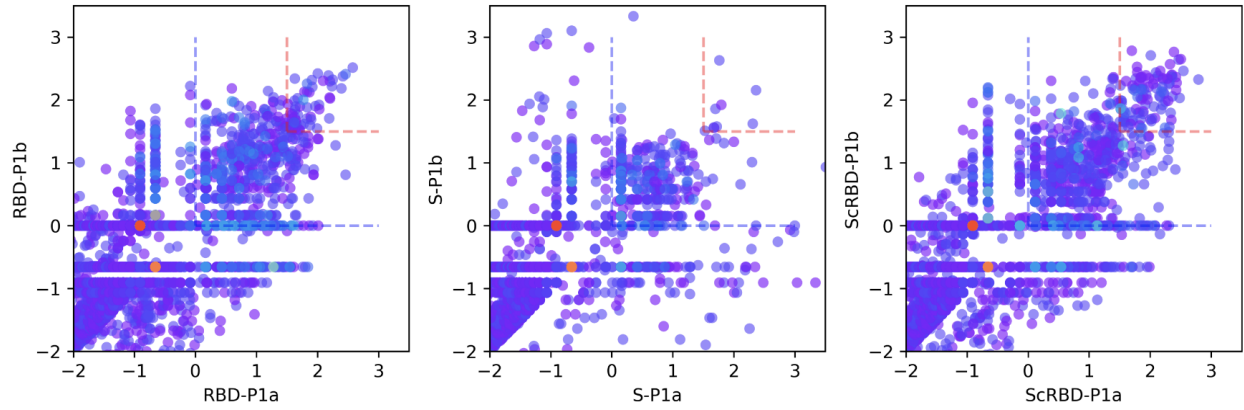

**Figure S1. Within-panning consistency estimation.** We compare two “versions” of each nanobody variant that differ by degenerate bases introduced with the cloning primer when establishing the baseline library. RBD and ScRBD panning shows consistency in enrichment, but spike panning is less consistent.

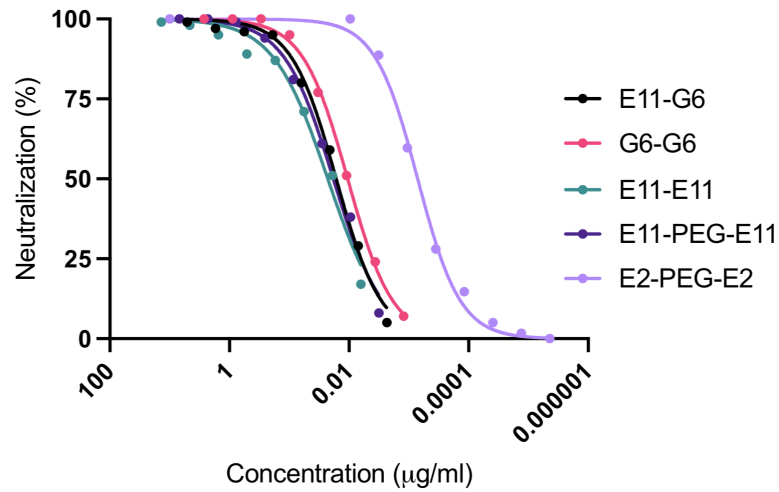

**Figure S2. Ultrapotent neutralization of SARS-CoV-2 by nanobody homo- and heterodimers.** Neutralization of SARS-CoV-2 spike pseudotyped lentiviruses are shown for nanobody dimers generated by Cu-free strain-promoted azide-alkyne click chemistry (SPAAC) reaction. E11 and G6 homo- and heterodimers neutralized with similarly high potency. An E2 dimer (with a short PEG11 spacer, E2-PEG-E2) was ultrapotent, with an IC50 of approximately 0.7 ng/ml (23 pM).

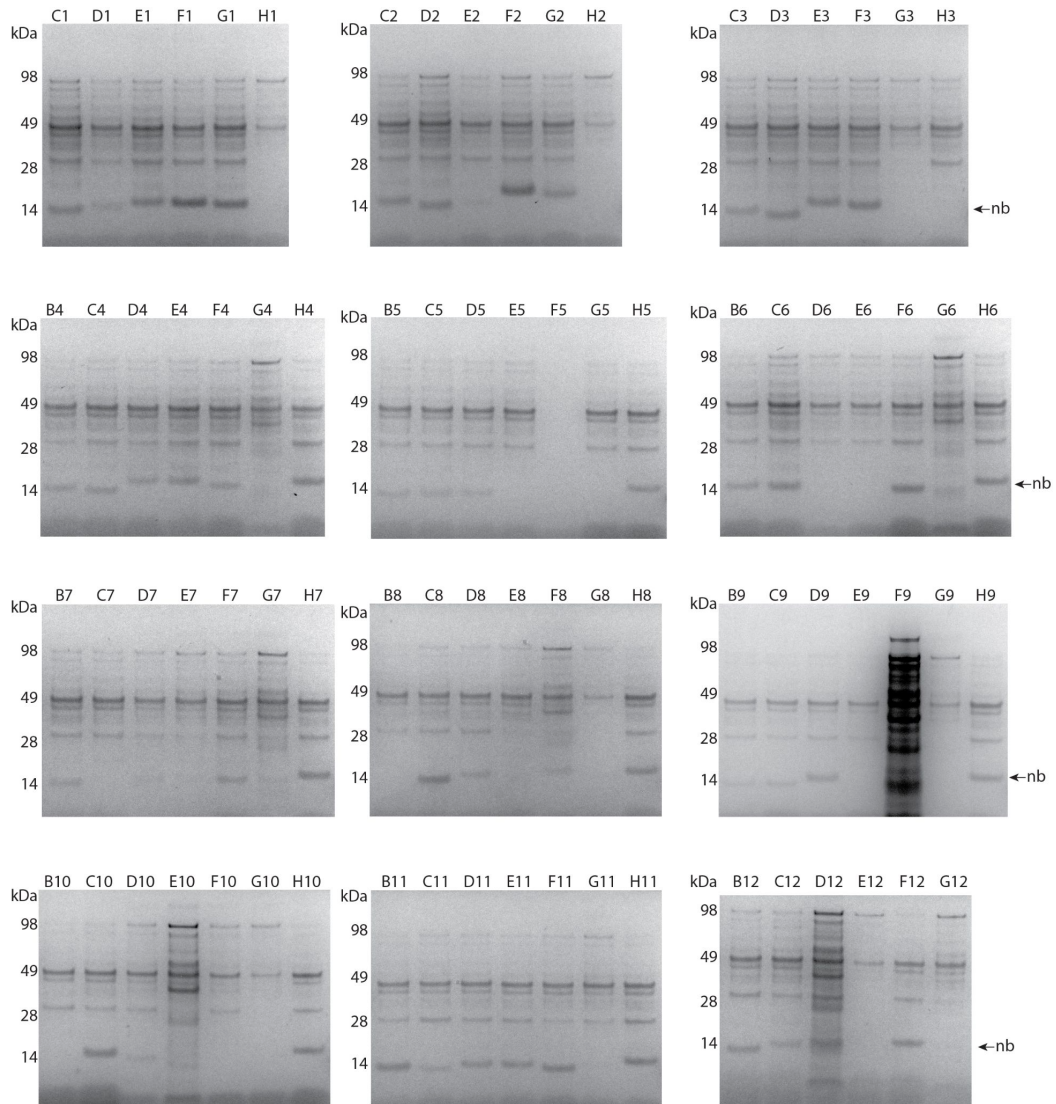

**Figure S3.** SDS-PAGE analysis and Coomassie staining of periplasmic extracts. Nanobodies (nb) run at 15 kDa.

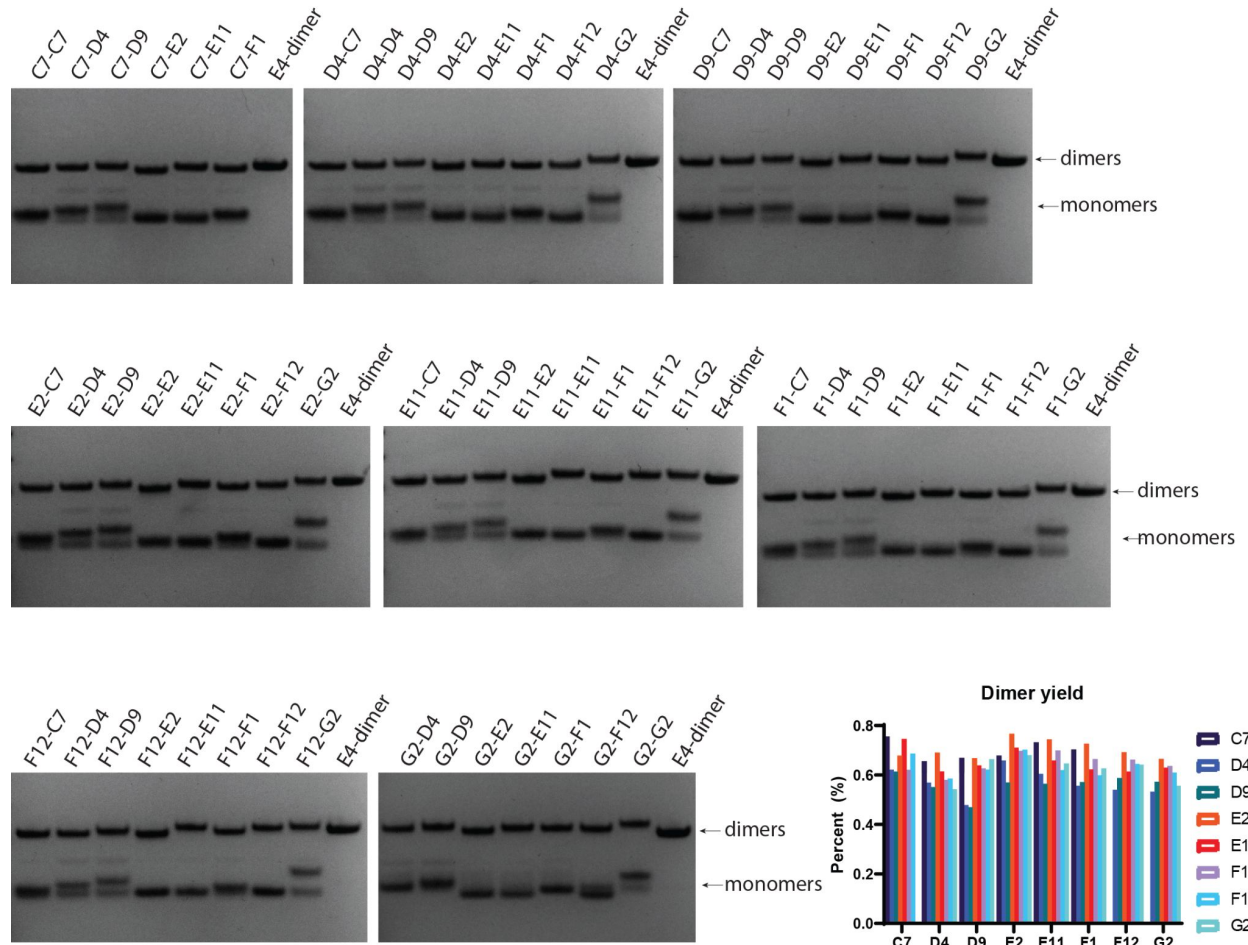

**Figure S4.** SDS-PAGE analysis and Coomassie staining of nanobody dimers generated to rapidly screen for potentially neutralizing dimer pairs.

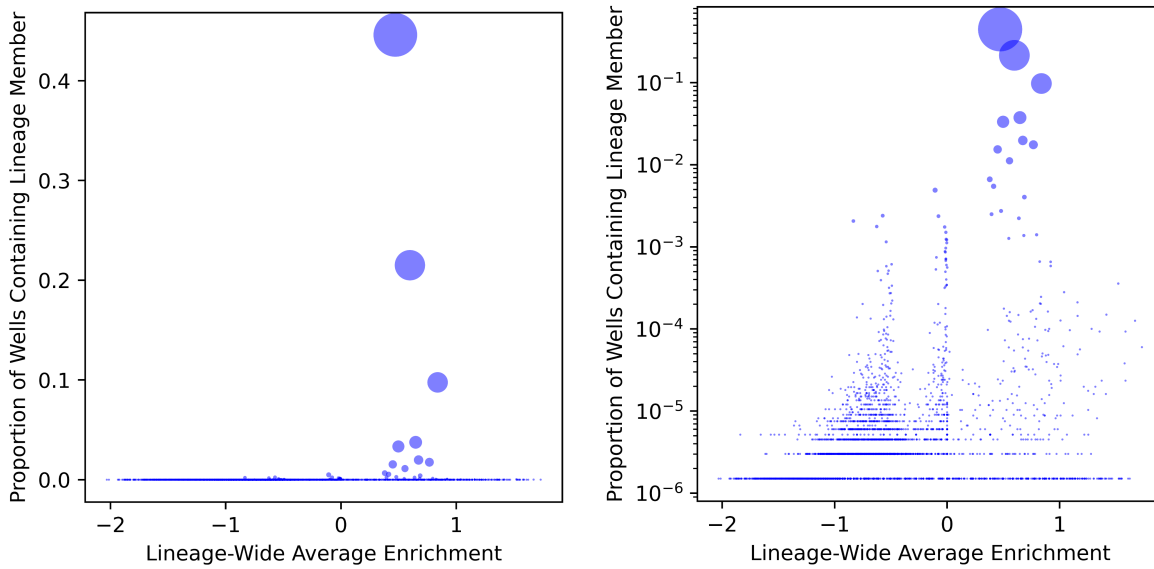

**Figure S5.** Lineage enrichment vs sampling probability. Each bubble represents a lineage, showing the mean enrichment for each lineage vs the probability that a single well would contain a member from that lineage, after a second round of RBD panning, estimated from NGS frequency data. The skewed size distribution of lineages, where a small number of lineages are extremely high frequency, shows that colony-based sampling approaches will not reach the lower frequency lineages. As an example, we would have had to screen nearly 500 colonies to have a >50% chance of discovering a member from the lineage of our highest affinity RBD binding nanobody (F1).

**Supplementary File S1. HDX Experimental Details.** Excel file containing HDX experimental conditions and results for five nanobodies.
